# Supplementary material for: A systems biology approach reveals new endoplasmic reticulum-associated targets for the correction of the ATP7B mutant causing Wilson disease
Source: Royal Society of Chemistry journal article supplement (doi:10.1039/c6mt00148c), 2016-01-01
Supplement: c6mt00148c1.pdf [file c6mt00148c1.pdf]

**SUPPLEMENTARY TABLE 1**  
**GENES DOWNREGULATED BY p38 INHIBITOR IN CELLS EXPRESSING ATP7B-H1069Q**

| <b>BIOLOGICAL PROCESS</b>                                                                                                 | <b>Number of genes</b> | <b>p-value</b> | <b>FDR</b> |
|---------------------------------------------------------------------------------------------------------------------------|------------------------|----------------|------------|
| complement activation, classical pathway                                                                                  | 18                     | 3.50E-12       | 6.50E-09   |
| humoral immune response mediated by circulating immunoglobulin                                                            | 18                     | 1.50E-11       | 2.80E-08   |
| complement activation                                                                                                     | 20                     | 7.90E-11       | 1.50E-07   |
| activation of plasma proteins involved in acute inflammatory response                                                     | 20                     | 1.30E-10       | 2.40E-07   |
| steroid metabolic process                                                                                                 | 46                     | 1.40E-10       | 2.60E-07   |
| protein maturation by peptide bond cleavage                                                                               | 28                     | 2.30E-10       | 4.20E-07   |
| acute inflammatory response                                                                                               | 28                     | 5.80E-09       | 1.10E-05   |
| protein processing                                                                                                        | 30                     | 7.50E-09       | 1.40E-05   |
| protein maturation                                                                                                        | 31                     | 1.50E-08       | 2.80E-05   |
| lymphocyte mediated immunity                                                                                              | 22                     | 5.60E-08       | 1.00E-04   |
| immunoglobulin mediated immune response                                                                                   | 19                     | 8.20E-08       | 1.50E-04   |
| cholesterol metabolic process                                                                                             | 25                     | 1.30E-07       | 2.30E-04   |
| B cell mediated immunity                                                                                                  | 19                     | 1.50E-07       | 2.80E-04   |
| response to wounding                                                                                                      | 77                     | 2.40E-07       | 4.50E-04   |
| humoral immune response                                                                                                   | 22                     | 5.40E-07       | 1.00E-03   |
| lipid biosynthetic process                                                                                                | 53                     | 6.30E-07       | 1.20E-03   |
| activation of immune response                                                                                             | 24                     | 7.90E-07       | 1.50E-03   |
| sterol metabolic process                                                                                                  | 25                     | 8.10E-07       | 1.50E-03   |
| adaptive immune response based on somatic recombination of immune receptors built from immunoglobulin superfamily domains | 21                     | 1.50E-06       | 2.80E-03   |
| adaptive immune response                                                                                                  | 21                     | 1.50E-06       | 2.80E-03   |
| leukocyte mediated immunity                                                                                               | 22                     | 2.40E-06       | 4.50E-03   |
| complement activation, alternative pathway                                                                                | 9                      | 5.90E-06       | 1.10E-02   |
| positive regulation of immune response                                                                                    | 29                     | 8.30E-06       | 1.50E-02   |
| innate immune response                                                                                                    | 28                     | 9.30E-06       | 1.70E-02   |
| steroid biosynthetic process                                                                                              | 20                     | 2.80E-05       | 5.20E-02   |
| fatty acid metabolic process                                                                                              | 34                     | 3.40E-05       | 6.30E-02   |
| acylglycerol metabolic process                                                                                            | 14                     | 8.00E-05       | 1.50E-01   |
| neutral lipid metabolic process                                                                                           | 14                     | 1.00E-04       | 1.80E-01   |
| positive regulation of response to stimulus                                                                               | 37                     | 1.00E-04       | 1.90E-01   |
| cholesterol biosynthetic process                                                                                          | 10                     | 1.10E-04       | 2.00E-01   |
| glycerol ether metabolic process                                                                                          | 14                     | 1.30E-04       | 2.30E-01   |
| organic ether metabolic process                                                                                           | 14                     | 1.90E-04       | 3.50E-01   |
| sterol biosynthetic process                                                                                               | 11                     | 2.70E-04       | 5.00E-01   |
| inflammatory response                                                                                                     | 45                     | 3.10E-04       | 5.70E-01   |
| immune effector process                                                                                                   | 24                     | 3.30E-04       | 6.00E-01   |
| triglyceride metabolic process                                                                                            | 12                     | 4.00E-04       | 7.30E-01   |

Supplementary table 1

|                                              |                        |                |            |
|----------------------------------------------|------------------------|----------------|------------|
| organic acid biosynthetic process            | 26                     | 4.90E-04       | 9.00E-01   |
| carboxylic acid biosynthetic process         | 26                     | 4.90E-04       | 9.00E-01   |
| response to oxidative stress                 | 27                     | 5.00E-04       | 9.20E-01   |
| positive regulation of immune system process | 35                     | 5.60E-04       | 1.00E+00   |
| response to hormone stimulus                 | 48                     | 7.00E-04       | 1.30E+00   |
| lipid transport                              | 24                     | 1.00E-03       | 1.90E+00   |
| response to endogenous stimulus              | 51                     | 1.10E-03       | 2.00E+00   |
| wound healing                                | 29                     | 1.10E-03       | 2.00E+00   |
| carboxylic acid transport                    | 24                     | 1.20E-03       | 2.30E+00   |
| organic acid transport                       | 24                     | 1.40E-03       | 2.50E+00   |
| microtubule-based process                    | 35                     | 1.60E-03       | 3.00E+00   |
| proteolysis                                  | 110                    | 2.00E-03       | 3.70E+00   |
| regulation of programmed cell death          | 88                     | 2.10E-03       | 3.80E+00   |
| glycerolipid metabolic process               | 25                     | 2.10E-03       | 3.80E+00   |
| negative regulation of transcription         | 55                     | 2.10E-03       | 3.80E+00   |
| oxidation reduction                          | 72                     | 2.10E-03       | 3.80E+00   |
| regulation of cell death                     | 88                     | 2.30E-03       | 4.20E+00   |
| regulation of apoptosis                      | 87                     | 2.30E-03       | 4.20E+00   |
| regulation of immune effector process        | 18                     | 2.30E-03       | 4.20E+00   |
| cellular amino acid catabolic process        | 14                     | 2.30E-03       | 4.20E+00   |
| homeostatic process                          | 82                     | 2.50E-03       | 4.50E+00   |
| liver development                            | 12                     | 2.50E-03       | 4.60E+00   |
| blood coagulation                            | 18                     | 2.60E-03       | 4.70E+00   |
| coagulation                                  | 18                     | 2.60E-03       | 4.70E+00   |
| carboxylic acid catabolic process            | 19                     | 2.70E-03       | 4.80E+00   |
| organic acid catabolic process               | 19                     | 2.70E-03       | 4.80E+00   |
| response to organic substance                | 79                     | 2.70E-03       | 4.90E+00   |
|                                              |                        |                |            |
| <b>CELLULAR COMPONENT</b>                    | <b>Number of genes</b> | <b>p-value</b> | <b>FDR</b> |
| endoplasmic reticulum                        | 121                    | 8.80E-08       | 1.30E-04   |
| membrane fraction                            | 106                    | 9.40E-08       | 1.40E-04   |
| insoluble fraction                           | 108                    | 1.70E-07       | 2.50E-04   |
| extracellular space                          | 91                     | 4.90E-07       | 7.00E-04   |
| Golgi apparatus                              | 108                    | 1.20E-06       | 1.70E-03   |
| cell fraction                                | 128                    | 1.30E-06       | 1.80E-03   |
| extracellular region part                    | 115                    | 2.60E-06       | 3.70E-03   |
| microsome                                    | 38                     | 3.60E-05       | 5.20E-02   |
| vesicular fraction                           | 38                     | 6.80E-05       | 9.80E-02   |
| ER-Golgi intermediate compartment            | 11                     | 9.60E-04       | 1.40E+00   |
| membrane attack complex                      | 5                      | 1.10E-03       | 1.50E+00   |

Supplementary table 1

|                                                                                       |                        |                |            |
|---------------------------------------------------------------------------------------|------------------------|----------------|------------|
| protein-lipid complex                                                                 | 10                     | 1.10E-03       | 1.60E+00   |
| plasma lipoprotein particle                                                           | 10                     | 1.10E-03       | 1.60E+00   |
| microtubule cytoskeleton                                                              | 64                     | 1.20E-03       | 1.70E+00   |
| microtubule                                                                           | 37                     | 1.40E-03       | 2.00E+00   |
| membrane-bounded vesicle                                                              | 65                     | 1.70E-03       | 2.40E+00   |
| cytoplasmic membrane-bounded vesicle                                                  | 63                     | 1.90E-03       | 2.80E+00   |
| vesicle                                                                               | 74                     | 2.10E-03       | 2.90E+00   |
| high-density lipoprotein particle                                                     | 8                      | 2.40E-03       | 3.40E+00   |
| Golgi stack                                                                           | 11                     | 2.40E-03       | 3.50E+00   |
| vesicle lumen                                                                         | 11                     | 2.40E-03       | 3.50E+00   |
| endoplasmic reticulum part                                                            | 43                     | 2.90E-03       | 4.00E+00   |
| endoplasmic reticulum lumen                                                           | 15                     | 3.30E-03       | 4.60E+00   |
|                                                                                       |                        |                |            |
| <b>MOLECULAR FUNCTION</b>                                                             | <b>Number of genes</b> | <b>p-value</b> | <b>FDR</b> |
| peptidase inhibitor activity                                                          | 29                     | 3.00E-05       | 4.90E-02   |
| endopeptidase inhibitor activity                                                      | 28                     | 3.00E-05       | 4.90E-02   |
| cation binding                                                                        | 392                    | 9.20E-05       | 1.50E-01   |
| ion binding                                                                           | 397                    | 9.40E-05       | 1.50E-01   |
| enzyme inhibitor activity                                                             | 41                     | 1.10E-04       | 1.80E-01   |
| solute:cation symporter activity                                                      | 20                     | 1.70E-04       | 2.70E-01   |
| metal ion binding                                                                     | 386                    | 1.80E-04       | 3.00E-01   |
| oxidoreductase activity, acting on the CH-NH group of donors                          | 10                     | 3.10E-04       | 5.00E-01   |
| serine-type endopeptidase inhibitor activity                                          | 19                     | 3.30E-04       | 5.30E-01   |
| magnesium ion binding                                                                 | 58                     | 4.20E-04       | 6.80E-01   |
| oxidoreductase activity, acting on the CH-CH group of donors, NAD or NADP as acceptor | 8                      | 4.50E-04       | 7.30E-01   |
| steroid binding                                                                       | 15                     | 4.50E-04       | 7.30E-01   |
| ligase activity, forming carbon-sulfur bonds                                          | 9                      | 9.40E-04       | 1.50E+00   |
| oxidoreductase activity, acting on the CH-NH group of donors, NAD or NADP as acceptor | 7                      | 2.10E-03       | 3.40E+00   |
| solute:sodium symporter activity                                                      | 12                     | 2.40E-03       | 3.80E+00   |
| steroid dehydrogenase activity                                                        | 9                      | 2.50E-03       | 4.00E+00   |
| anion:cation symporter activity                                                       | 9                      | 2.50E-03       | 4.00E+00   |
| symporter activity                                                                    | 22                     | 3.00E-03       | 4.70E+00   |
|                                                                                       |                        |                |            |
| <b>KEGG PATHWAY</b>                                                                   | <b>Number of genes</b> | <b>p-value</b> | <b>FDR</b> |
| Complement and coagulation cascades                                                   | 33                     | 5.00E-17       | 6.20E-14   |
