# Supplementary material for: A systems biology approach reveals new endoplasmic reticulum-associated targets for the correction of the ATP7B mutant causing Wilson disease
Source: Royal Society of Chemistry journal article supplement (doi:10.1039/c6mt00148c), 2016-01-01
Supplement: c6mt00148c2.pdf [file c6mt00148c2.pdf]

**SUPPLEMENTARY TABLE 2**  
**GENES DOWNREGULATED BY JNK INHIBITOR IN CELLS EXPRESSING ATP7B-H1069Q**

| <b>BIOLOGICAL PROCESS</b>                                                                                                 | <b>Number of genes</b> | <b>p-value</b> | <b>FDR</b> |
|---------------------------------------------------------------------------------------------------------------------------|------------------------|----------------|------------|
| response to unfolded protein                                                                                              | 17                     | 2.00E-05       | 3.70E-02   |
| cellular amino acid derivative metabolic process                                                                          | 28                     | 2.50E-05       | 4.60E-02   |
| cellular component maintenance                                                                                            | 9                      | 1.90E-04       | 3.40E-01   |
| adaptive immune response based on somatic recombination of immune receptors built from immunoglobulin superfamily domains | 15                     | 7.00E-04       | 1.30E+00   |
| adaptive immune response                                                                                                  | 15                     | 7.00E-04       | 1.30E+00   |
| cell death                                                                                                                | 73                     | 8.00E-04       | 1.50E+00   |
| response to wounding                                                                                                      | 57                     | 8.80E-04       | 1.60E+00   |
| death                                                                                                                     | 73                     | 9.70E-04       | 1.80E+00   |
| regulation of protein kinase cascade                                                                                      | 32                     | 9.90E-04       | 1.80E+00   |
| response to protein stimulus                                                                                              | 18                     | 1.00E-03       | 1.80E+00   |
| positive regulation of protein kinase cascade                                                                             | 24                     | 1.10E-03       | 2.00E+00   |
| vesicle-mediated transport                                                                                                | 60                     | 1.30E-03       | 2.40E+00   |
| programmed cell death                                                                                                     | 62                     | 2.10E-03       | 3.80E+00   |
| leukocyte mediated immunity                                                                                               | 15                     | 2.10E-03       | 3.80E+00   |
| photoreceptor cell maintenance                                                                                            | 7                      | 2.30E-03       | 4.20E+00   |
| regulation of programmed cell death                                                                                       | 78                     | 2.40E-03       | 4.40E+00   |
| cellular carbohydrate biosynthetic process                                                                                | 13                     | 2.50E-03       | 4.40E+00   |
| membrane invagination                                                                                                     | 28                     | 2.50E-03       | 4.50E+00   |
| endocytosis                                                                                                               | 28                     | 2.50E-03       | 4.50E+00   |
| alcohol biosynthetic process                                                                                              | 10                     | 2.70E-03       | 4.80E+00   |
| regulation of cell death                                                                                                  | 78                     | 2.80E-03       | 4.90E+00   |
| lymphocyte mediated immunity                                                                                              | 13                     | 2.80E-03       | 5.00E+00   |
|                                                                                                                           |                        |                |            |
| <b>CELLULAR COMPONENT</b>                                                                                                 | <b>Number of genes</b> | <b>p-value</b> | <b>FDR</b> |
| membrane fraction                                                                                                         | 121                    | 8.80E-08       | 1.30E-04   |
| insoluble fraction                                                                                                        | 106                    | 9.40E-08       | 1.40E-04   |
| plasma membrane part                                                                                                      | 108                    | 1.70E-07       | 2.50E-04   |
| cell fraction                                                                                                             | 91                     | 4.90E-07       | 7.00E-04   |
| endoplasmic reticulum                                                                                                     | 108                    | 1.20E-06       | 1.70E-03   |
| vesicle                                                                                                                   | 128                    | 1.30E-06       | 1.80E-03   |
| cytoplasmic vesicle                                                                                                       | 115                    | 2.60E-06       | 3.70E-03   |
| cytoplasmic membrane-bounded vesicle                                                                                      | 38                     | 3.60E-05       | 5.20E-02   |
| membrane-bounded vesicle                                                                                                  | 38                     | 6.80E-05       | 9.80E-02   |
| integral to organelle membrane                                                                                            | 11                     | 9.60E-04       | 1.40E+00   |
| secretory granule                                                                                                         | 5                      | 1.10E-03       | 1.50E+00   |

Supplementary table 2

|                                                                                       |                        |                |            |
|---------------------------------------------------------------------------------------|------------------------|----------------|------------|
| intrinsic to organelle membrane                                                       | 10                     | 1.10E-03       | 1.60E+00   |
| anchoring collagen                                                                    | 10                     | 1.10E-03       | 1.60E+00   |
| cell junction                                                                         | 64                     | 1.20E-03       | 1.70E+00   |
|                                                                                       |                        |                |            |
| <b>MOLECULAR FUNCTION</b>                                                             | <b>Number of genes</b> | <b>p-value</b> | <b>FDR</b> |
| protein dimerization activity                                                         | 61                     | 1.30E-04       | 2.00E-01   |
| antiporter activity                                                                   | 13                     | 2.00E-03       | 3.10E+00   |
| identical protein binding                                                             | 64                     | 2.00E-03       | 3.10E+00   |
| solute:solute antiporter activity                                                     | 11                     | 3.20E-03       | 5.00E+00   |
| GTPase activity                                                                       | 26                     | 4.90E-03       | 7.50E+00   |
| cytokine binding                                                                      | 16                     | 7.00E-03       | 1.10E+01   |
| protein homodimerization activity                                                     | 36                     | 7.40E-03       | 1.10E+01   |
| butyrate-CoA ligase activity                                                          | 4                      | 9.00E-03       | 1.30E+01   |
| protein kinase inhibitor activity                                                     | 8                      | 9.80E-03       | 1.50E+01   |
| kinase inhibitor activity                                                             | 8                      | 1.10E-02       | 1.70E+01   |
| enzyme activator activity                                                             | 35                     | 1.30E-02       | 1.90E+01   |
| di-, tri-valent inorganic cation transmembrane transporter activity                   | 8                      | 1.50E-02       | 2.20E+01   |
| GTPase activator activity                                                             | 25                     | 1.50E-02       | 2.20E+01   |
| anion:cation symporter activity                                                       | 7                      | 1.70E-02       | 2.40E+01   |
| purine nucleotide binding                                                             | 154                    | 1.80E-02       | 2.50E+01   |
| ribonucleotide binding                                                                | 147                    | 2.40E-02       | 3.20E+01   |
| purine ribonucleotide binding                                                         | 147                    | 2.40E-02       | 3.20E+01   |
| nucleoside-triphosphatase regulator activity                                          | 40                     | 2.40E-02       | 3.20E+01   |
| troponin T binding                                                                    | 3                      | 2.50E-02       | 3.40E+01   |
| sodium:dicarboxylate symporter activity                                               | 4                      | 2.60E-02       | 3.50E+01   |
| heat shock protein binding                                                            | 11                     | 2.80E-02       | 3.70E+01   |
| pyridoxal phosphate binding                                                           | 9                      | 2.90E-02       | 3.70E+01   |
| vitamin B6 binding                                                                    | 9                      | 2.90E-02       | 3.70E+01   |
| oxidoreductase activity, acting on the CH-NH group of donors, NAD or NADP as acceptor | 5                      | 3.10E-02       | 3.90E+01   |
| nucleotide binding                                                                    | 175                    | 3.20E-02       | 4.10E+01   |
| motor activity                                                                        | 17                     | 3.30E-02       | 4.10E+01   |
| cofactor binding                                                                      | 26                     | 3.40E-02       | 4.20E+01   |
| extracellular matrix binding                                                          | 6                      | 3.40E-02       | 4.20E+01   |
| transition metal ion transmembrane transporter activity                               | 6                      | 3.40E-02       | 4.20E+01   |
| small GTPase regulator activity                                                       | 28                     | 3.40E-02       | 4.30E+01   |
| transcription corepressor activity                                                    | 17                     | 3.90E-02       | 4.70E+01   |
| O-acetyltransferase activity                                                          | 3                      | 4.10E-02       | 4.80E+01   |
| GTPase regulator activity                                                             | 38                     | 4.10E-02       | 4.80E+01   |
| protein serine/threonine kinase activity                                              | 40                     | 4.10E-02       | 4.90E+01   |
| anion transmembrane transporter activity                                              | 17                     | 4.30E-02       | 5.00E+01   |

Supplementary table 2

|                                                               |                        |                |            |
|---------------------------------------------------------------|------------------------|----------------|------------|
| nucleoside binding                                            | 128                    | 4.30E-02       | 5.10E+01   |
| anion:anion antiporter activity                               | 5                      | 4.30E-02       | 5.10E+01   |
| lipopolysaccharide binding                                    | 4                      | 4.40E-02       | 5.10E+01   |
| oxidoreductase activity, acting on the CH-NH group of donors  | 6                      | 4.40E-02       | 5.10E+01   |
| ARF GTPase activator activity                                 | 6                      | 4.40E-02       | 5.10E+01   |
| purine nucleoside binding                                     | 127                    | 4.40E-02       | 5.20E+01   |
| Ras GTPase activator activity                                 | 12                     | 4.50E-02       | 5.20E+01   |
| enzyme binding                                                | 47                     | 4.50E-02       | 5.20E+01   |
| O-acyltransferase activity                                    | 7                      | 4.70E-02       | 5.40E+01   |
| enzyme inhibitor activity                                     | 27                     | 4.70E-02       | 5.40E+01   |
| GTP binding                                                   | 35                     | 4.90E-02       | 5.50E+01   |
| neutral amino acid transmembrane transporter activity         | 5                      | 5.10E-02       | 5.60E+01   |
| adenyl nucleotide binding                                     | 124                    | 5.80E-02       | 6.10E+01   |
| copper ion transmembrane transporter activity                 | 3                      | 5.80E-02       | 6.10E+01   |
| lipid transporter activity                                    | 9                      | 6.40E-02       | 6.50E+01   |
| calcium-dependent protein binding                             | 6                      | 6.40E-02       | 6.50E+01   |
| amine transmembrane transporter activity                      | 10                     | 6.40E-02       | 6.50E+01   |
| guanyl ribonucleotide binding                                 | 35                     | 6.70E-02       | 6.70E+01   |
| guanyl nucleotide binding                                     | 35                     | 6.70E-02       | 6.70E+01   |
| protein domain specific binding                               | 31                     | 6.70E-02       | 6.70E+01   |
| ATP binding                                                   | 116                    | 6.90E-02       | 6.80E+01   |
| adenyl ribonucleotide binding                                 | 117                    | 7.50E-02       | 7.10E+01   |
| protein heterodimerization activity                           | 21                     | 7.60E-02       | 7.10E+01   |
| protein kinase binding                                        | 16                     | 7.70E-02       | 7.20E+01   |
| cytokine receptor activity                                    | 8                      | 7.90E-02       | 7.30E+01   |
| organic acid:sodium symporter activity                        | 5                      | 8.70E-02       | 7.70E+01   |
| scavenger receptor activity                                   | 7                      | 9.10E-02       | 7.80E+01   |
| dicarboxylic acid transmembrane transporter activity          | 4                      | 9.10E-02       | 7.80E+01   |
| unfolded protein binding                                      | 13                     | 9.30E-02       | 7.90E+01   |
| calcium ion binding                                           | 74                     | 9.40E-02       | 7.90E+01   |
| ligase activity, forming carbon-oxygen bonds                  | 7                      | 9.90E-02       | 8.10E+01   |
| ligase activity, forming aminoacyl-tRNA and related compounds | 7                      | 9.90E-02       | 8.10E+01   |
| aminoacyl-tRNA ligase activity                                | 7                      | 9.90E-02       | 8.10E+01   |
| quinone binding                                               | 3                      | 9.90E-02       | 8.10E+01   |
| chitinase activity                                            | 3                      | 9.90E-02       | 8.10E+01   |
| protein kinase regulator activity                             | 10                     | 1.00E-01       | 8.10E+01   |
|                                                               |                        |                |            |
| <b>KEGG PATHWAY</b>                                           | <b>Number of genes</b> | <b>p-value</b> | <b>FDR</b> |
| Complement and coagulation cascades                           | 16                     | 9.50E-05       | 1.20E-01   |
| MAPK signaling pathway                                        | 35                     | 8.00E-04       | 9.70E-01   |

Supplementary table 2

|                                             |    |          |          |
|---------------------------------------------|----|----------|----------|
| Glutathione metabolism                      | 10 | 9.00E-03 | 1.00E+01 |
| Cysteine and methionine metabolism          | 8  | 9.90E-03 | 1.10E+01 |
| Arachidonic acid metabolism                 | 10 | 1.90E-02 | 2.00E+01 |
| Cell adhesion molecules (CAMs)              | 17 | 2.90E-02 | 3.00E+01 |
| Arginine and proline metabolism             | 9  | 3.60E-02 | 3.60E+01 |
| Selenoamino acid metabolism                 | 6  | 3.70E-02 | 3.60E+01 |
| Hematopoietic cell lineage                  | 12 | 4.60E-02 | 4.40E+01 |
| Glycerophospholipid metabolism              | 10 | 5.60E-02 | 5.10E+01 |
| PPAR signaling pathway                      | 10 | 6.10E-02 | 5.30E+01 |
| Alanine, aspartate and glutamate metabolism | 6  | 7.10E-02 | 5.90E+01 |
| Glycine, serine and threonine metabolism    | 6  | 7.10E-02 | 5.90E+01 |
| Aminoacyl-tRNA biosynthesis                 | 7  | 7.40E-02 | 6.10E+01 |
| Bladder cancer                              | 7  | 8.10E-02 | 6.40E+01 |
| VEGF signaling pathway                      | 10 | 9.20E-02 | 6.90E+01 |
